# ESHRE guideline: routine psychosocial care in infertility and medically assisted reproduction—a guide for fertility staff†

S. Gameiro<sup>1,\*</sup>, J. Boivin<sup>1</sup>, E. Dancet<sup>2,3</sup>, C. de Klerk<sup>4</sup>, M. Emery<sup>5</sup>,  
C. Lewis-Jones<sup>6</sup>, P. Thorn<sup>7</sup>, U. Van den Broeck<sup>2</sup>, C. Venetis<sup>8</sup>,  
C.M. Verhaak<sup>9</sup>, T. Wischmann<sup>10</sup>, and N. Vermeulen<sup>11</sup>

<sup>1</sup>Cardiff Fertility Studies Research Group, School of Psychology, Cardiff University, CF10 3AT Cardiff, UK <sup>2</sup>Leuven University Fertility Centre, University Hospitals Leuven, 3000 Leuven, Belgium <sup>3</sup>Center for Reproductive Medicine, Women's and Children's Hospital, Academic Medical Center, University of Amsterdam, Amsterdam 1105 AZ, The Netherlands <sup>4</sup>Department of Psychiatry, Section Medical Psychology and Psychotherapy, Erasmus MC University Medical Centre, Rotterdam 3000 CA, The Netherlands <sup>5</sup>Centre for Medically Assisted Procreation—CPMA, CH-1003 Lausanne, Switzerland <sup>6</sup>Infertility Network UK, East Sussex TN40 1JA, UK <sup>7</sup>Practice for Couple and Family Therapy, 64546 Moerfelden, Germany <sup>8</sup>Women's and Children's Health, St George Hospital, University of New South Wales, NSW 2217 Sydney, Australia <sup>9</sup>Department of Psychology, Radboud University Medical Center, 6500 HB Nijmegen, The Netherlands <sup>10</sup>Institute of Medical Psychology, Centre for Psychosocial Medicine, Heidelberg University Hospital, 69115 Heidelberg, Germany <sup>11</sup>European Society for Human Reproduction and Embryology, 1852 Grimbergen, Belgium

\*Correspondence address. E-mail: gameiros@cardiff.ac.uk

Submitted on April 21, 2015; resubmitted on April 21, 2015; accepted on June 11, 2015

**STUDY QUESTION:** Based on the best available evidence in the literature, what is the optimal management of routine psychosocial care at infertility and medically assisted reproduction (MAR) clinics?

**SUMMARY ANSWER:** Using the structured methodology of the Manual for the European Society of Human Reproduction and Embryology (ESHRE) Guideline Development, 120 recommendations were formulated that answered the 12 key questions on optimal management of routine psychosocial care by all fertility staff.

**WHAT IS ALREADY KNOWN:** The 2002 ESHRE Guidelines for counselling in infertility has been a reference point for best psychosocial care in infertility for years, but this guideline needed updating and did not focus on routine psychosocial care that can be delivered by all fertility staff.

**STUDY, DESIGN, SIZE, DURATION:** This guideline was produced by a group of experts in the field according to the 12-step process described in the ESHRE Manual for Guideline Development. After scoping the guideline and listing a set of 12 key questions in PICO (Patient, Intervention, Comparison and Outcome) format, thorough systematic searches of the literature were conducted; evidence from papers published until April 2014 was collected, evaluated for quality and analysed. A summary of evidence was written in a reply to each of the key questions and used as the basis for recommendations, which were defined by consensus within the guideline development group (GDG). Patient and additional clinical input was collected during the scoping and the review phase of the guideline development.

**PARTICIPANTS/MATERIALS, SETTING, METHODS:** The guideline group, comprising psychologists, two medical doctors, a midwife, a patient representative and a methodological expert, met three times to discuss evidence and reach consensus on the recommendations.

**MAIN RESULTS AND THE ROLE OF CHANCE: THE GUIDELINE PROVIDES:** 120 recommendations that aim at guiding fertility clinic staff in providing optimal evidence-based routine psychosocial care to patients dealing with infertility and MAR. The guideline is written in two sections. The first section describes patients' preferences regarding the psychosocial care they would like to receive at clinics and how this care is associated with their well-being. The second section of the guideline provides information about the psychosocial needs patients experience across their treatment pathway (before, during and after treatment) and how fertility clinic staff can detect and address these. Needs refer to conditions assumed necessary for patients to have a healthy experience of the fertility treatment. Needs can be behavioural (lifestyle, exercise, nutrition and compliance), relational (relationship with partner if there is one, family friends and larger network, and work), emotional (well-being, e.g. anxiety, depression and quality of life) and cognitive (treatment concerns and knowledge).

†ESHRE pages content is not externally peer reviewed. The manuscript has been approved by the Executive Committee of ESHRE.

**LIMITATIONS, REASONS FOR CAUTION:** We identified many areas in care for which robust evidence was lacking. Gaps in evidence were addressed by formulating good practice points, based on the expert opinion of the GDG, but it is critical for such recommendations to be empirically validated.

**WIDER IMPLICATIONS OF THE FINDINGS:** The evidence presented in this guideline shows that providing routine psychosocial care is associated with or has potential to reduce stress and concerns about medical procedures and improve lifestyle outcomes, fertility-related knowledge, patient well-being and compliance with treatment. As only 45 (36.0%) of the 125 recommendations were based on high-quality evidence, the guideline group formulated recommendations to guide future research with the aim of increasing the body of evidence.

**STUDY FUNDING/COMPETING INTEREST(S):** The guideline was developed and funded by ESHRE, covering expenses associated with the guideline meetings, with literature searches, and with the implementation of the guideline. The GDG members did not receive payment. S.G., E.D., C.d.K., M.E., U.V.d.B., C.L.-J. and N.V. report no conflicts of interest. J.B. reports grants from Merck & Co, consulting fees from Merck Serono S.A. and Speaker's fees from Merck Serono S.A. P.T. reports consulting fees from the German government and being the Chair of the German Society for Fertility Counselling. C.V. reports consulting fees from Merck Serono S.A. C.M.V. reports being adviser in projects for Merck Serono S.A. and Ferring S.A. on patient educational material. T.W. reports speaker's fees from Repromed, DGPM, Breitbach, DAAG, fiore, LPTW, MSD, salary/position funding at TAB-beim-Bundestag, BZgA, and being the Vice-chair of the German Society for Fertility Counselling.

**TRIAL REGISTRATION NUMBER:** NA.

**Key words:** guideline / psychosocial care / infertility / assisted reproduction / evidence-based

## Introduction

The European Society of Human Reproduction and Embryology (ESHRE) Guideline 'Routine psychosocial care in infertility and medically assisted reproduction – A guide for fertility staff' offers evidence-based best practice advice to all fertility clinic staff (doctors, nurses, midwives, counsellors, social workers, psychologists, embryologists and administrative personnel) on how to incorporate psychosocial care in routine infertility care. Psychosocial care is defined as care that enables couples, their families and their health care providers to optimize infertility care and manage the psychological and social implications of infertility and its treatment (2008).

Psychosocial care is important in infertility care because most patients experience emotional distress during treatment (Verhaak *et al.*, 2007a; Knoll *et al.*, 2009; Karatas *et al.*, 2011), ~23% discontinue prematurely because of the perceived burden of treatment (Brandes *et al.*, 2009), and one-third of patients end treatment without achieving pregnancy (Pinborg *et al.*, 2009) and experience difficulties in adjusting to unmet parenthood goals (Verhaak *et al.*, 2007b; Johansson *et al.*, 2010; Wischmann *et al.*, 2012; Gameiro *et al.*, 2014). Even when a pregnancy is achieved, it is experienced with increased anxiety about the viability and health of the foetus (Hammarberg *et al.*, 2008). By offering psychosocial care in combination with medical care during routine practice, fertility clinic staff can ensure that care is accessible for all patients and addresses their most common needs. For these reasons, psychosocial care should be the responsibility of all staff members that have contact with patients.

## Scope

The ESHRE guideline provides information about two issues. First, about the preferences of patients regarding the psychosocial care, they would like to receive at clinics and how this care is associated with their well-being. Second, about the psychosocial needs that patients experience across their treatment pathway, and how staff can detect and address these needs. Thus, the guideline describes patients' needs, informs about risk factors for specific psychosocial needs and tools to detect these and lists evidence-based psychosocial interventions that can be delivered by members of staff without specialised training in mental health care and do not require the active intervention of mental-health professionals (e.g. specialist counsellors, psychologists and psychiatrists).

The guideline is organised according to a horizontal 'time' axis and a vertical 'needs' axis with the aim of tailoring care to the different psychosocial needs patients experience across time at different treatment stages. This approach is depicted in Fig. 1. The time axis includes three stages: before, during and after treatment. The needs axis refers to conditions assumed necessary for patients to have a healthy experience of the fertility treatment. Needs can be behavioural (i.e. lifestyle, exercise, nutrition and compliance), relational (i.e. relationship with partner, family, friends and larger network, and work), emotional (i.e. anxiety, depression and quality of life) and cognitive (i.e. treatment concerns and knowledge).

## Methods

The guideline was developed according to the Manual for ESHRE Guideline Development (Nelen, 2009). All details on the methodology can be found in the full version of the guideline available at [www.eshre.eu/Guidelines](http://www.eshre.eu/Guidelines). For each recommendation, a grade (A–C) was assigned based on the strength of the supporting evidence (Scottish Intercollegiate Guidelines Network, 2010). In case of the absence of evidence, the guideline development group (GDG) offered good practice points (GPP), based on expert opinion.

## Key questions and recommendations

The current document summarizes the key questions and the recommendations for clinical practice. Further background information and the supporting evidence for each recommendation can be found in the full version of the guideline available at <http://www.eshre.eu/Guidelines-and-Legal/Guidelines/Psychosocial-care-guideline.aspx>.

### Psychosocial care: patients' preferences and well-being

*Which aspects and components of psychosocial care are important to patients?*

Fertility staff should be aware that patients value:

- how staff relate to them (Ryan, 1999; Schmidt *et al.*, 2003; Dancet *et al.*, 2010; van Empel *et al.*, 2010, 2011). [A]; staff showing understanding and paying attention to the emotional impact of infertility (Schmidt *et al.*, 2003; Dancet *et al.*, 2010; van Empel *et al.*, 2010). [A]; that both partners are involved in the treatment process (Dancet *et al.*, 2010). [A] being involved in decision-making (Dancet *et al.*, 2010). [A];
- receiving psychosocial care from sensitive and trustworthy staff members (Dancet *et al.*, 2010; van Empel *et al.*, 2010). [A];

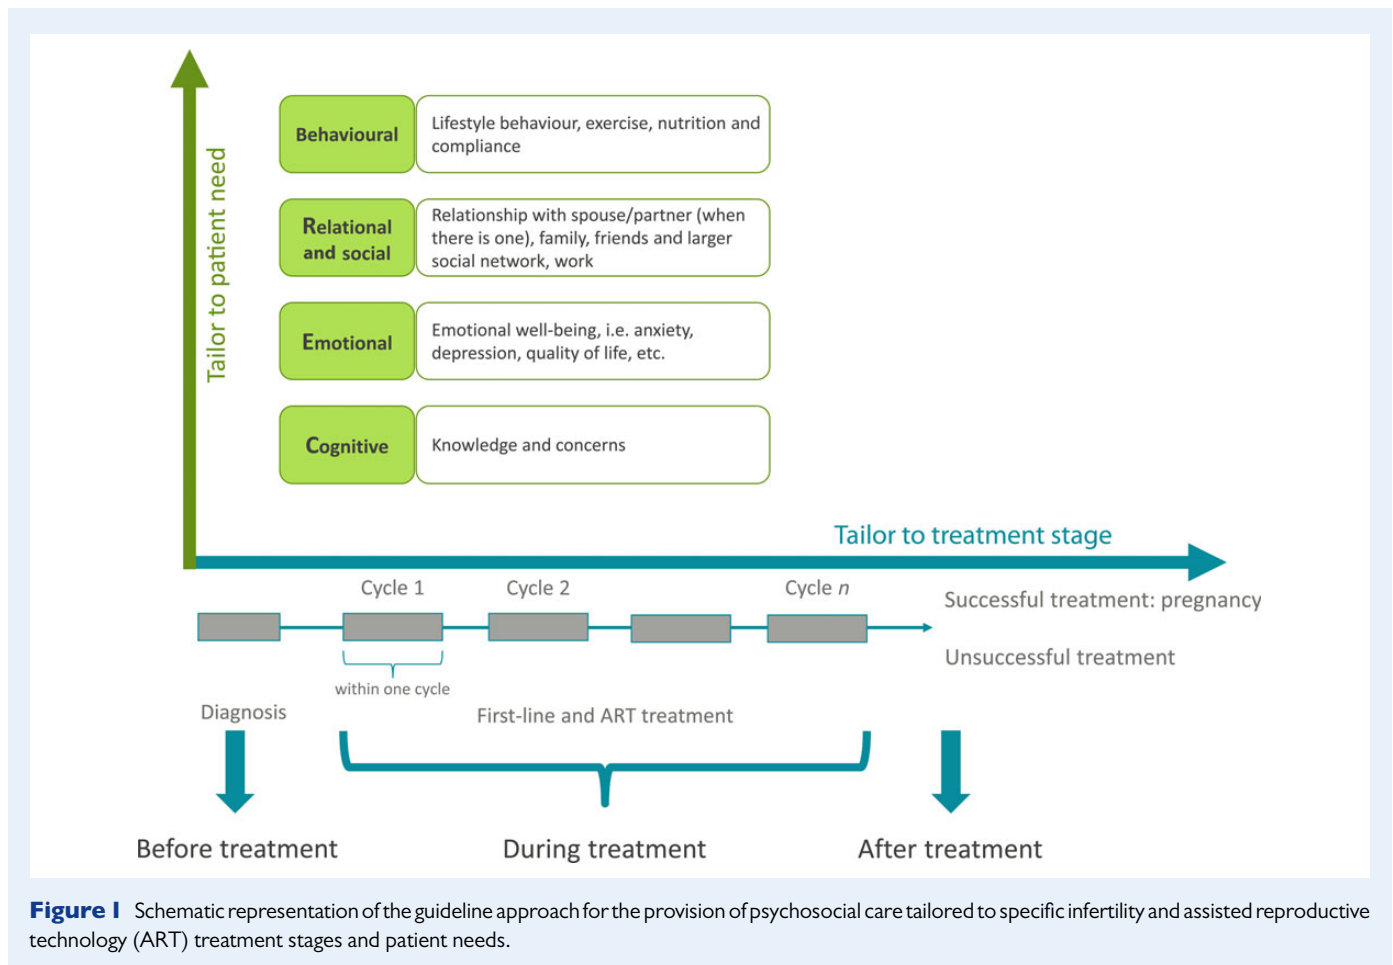

receiving attention to their distinct needs related to their medical history (Karatas et al., 2010). [B].

Fertility staff should be aware that patients value:

- minimal waiting times, not being hurried in medical consultations, and continuity of care (Ryan, 1999; Dancet et al., 2010). [A];
- the professional competence of fertility staff and receiving personalized care (Dancet et al., 2010). [A];
- the provision of opportunities for contact with other patients (Dancet et al., 2010). [A] being in a clinic dedicated to infertility care (Dancet et al., 2010). [A];
- the offer of specialized psychosocial care (infertility counselling or psychotherapy) before, during and after IVF treatment (Dancet et al., 2010). [B].

The GDG recommends fertility staff to be aware that:

- patients expressing a need for emotional support value the offer of specialized psychosocial care (infertility counselling or psychotherapy). [GPP];
- patients may value the presence of a chaperone during medical examinations. [GPP];
- men value rooms designated for producing sperm samples. [GPP].

*Which routine psychosocial care components are important to patients?*

Fertility staff should be aware that patients value:

- written treatment-relevant information (Schmidt et al., 2003; Dancet et al., 2010; Mourad et al., 2011). [C]; explanations about treatment results and treatment options (Schmidt et al., 2003). [C];
- understandable and customized (i.e. personally relevant) treatment information (Schmidt et al., 2003; Dancet et al., 2010; Mourad et al., 2011). [C];

the provision of information about psychosocial care options (e.g. contact details of support groups, online support options, access to infertility counselling or psychotherapy) (Schmidt et al., 2003; Cousineau et al., 2008; Dancet et al., 2010; Sexton et al., 2010). [B].

Fertility staff should be aware that IVF patients equally prefer in-person or telephone consultation to discuss their treatment results and future plans (Stewart et al., 2001). [C].

*Which characteristic of fertility staff and clinics are associated with patients' well-being?*

Fertility staff should be aware that:

- receiving patient-centred care is associated with better patient well-being (Aarts et al., 2012; Gameiro et al., 2013a). [C];
- positive staff characteristics (communication, respect, competence, involvement and information) are associated with better patient well-being (Aarts et al., 2012; Gameiro et al., 2013a). [C]; positive clinic characteristics (information, competence of clinic and staff, and continuity) are associated with better patient well-being (Aarts et al., 2012; Gameiro et al., 2013a). [C];

Fertility staff should be aware that offering the currently available interactive complex interventions (complex interventions integrate several psychosocial components (e.g. information provision, training in coping or relaxation strategies) is not likely to affect patient individual and relational well-being (Shu-Hsin, 2003; van Zyl et al., 2005; Gürhan et al., 2007; Mori, 2009). [B]. Fertility staff should provide preparatory information about diagnostic procedures because it decreases infertility-specific anxiety and stress (Pook and Krause, 2005). [C].

Fertility staff should be aware that:

- tailored online psycho-educational interventions may improve infertility-specific stress and self-efficacy, and the sexual and social concerns of particular groups of patients (Cousineau *et al.*, 2008). [C];
- providing IVF patients with access to an internet-based personal health record is not likely to promote their emotional well-being (depression, anxiety and self-efficacy) (Tuil *et al.*, 2007). [C].

### Psychosocial care before treatment

The 'before treatment' period refers to the period that begins at the first visit to the clinic until the start of the first treatment cycle, being it either first-line treatment such as intrauterine insemination (IUI) or assisted reproductive technology (ART) treatment.

*What are the needs of patients before treatment?*

#### Behavioural needs

Fertility staff should be aware that:

- one in 10 patients referred for fertility treatment chooses not to start treatment (Brandes *et al.*, 2009). [C];
- the reasons patients state for not starting any type of recommended fertility treatment are: rejection of treatment (due to ethical objections, concerns about and lack of interest in treatment), personal reasons, relational problems, financial issues and psychological burden of treatment (Gameiro *et al.*, 2012). [B];
- the reasons patients on the waiting list to start ART treatment state for not starting recommended ART treatment are: relational problems, psychological burden of treatment, personal reasons, clinic-related problems and financial issues (Gameiro *et al.*, 2012). [B];
- a considerable number of patients have lifestyle behaviours that may negatively affect their general and reproductive health (Klonoff-Cohen *et al.*, 2001; Freizinger *et al.*, 2010; Schilling *et al.*, 2012). [C];

#### Relational and social needs

Fertility staff should be aware that:

- patients starting first-line or ART treatments do not have worse marital and sexual relationships than the general population (Slade *et al.*, 1997; Edelman and Connolly, 2000; Verhaak *et al.*, 2001; Verhaak *et al.*, 2005a). [B];
- patients in fertility workup do not present higher prevalence rates of sexual dysfunctions than the general population (Shindel *et al.*, 2008). [C].

#### Emotional needs

Fertility staff should be aware that:

- before the start of IVF treatment, patients are not more depressed than the general population or matched controls (Verhaak *et al.*, 2007a; Lintsen *et al.*, 2009; Lewis *et al.*, 2013). [B];
- evidence about whether before the start of a first IVF cycle patients are more anxious (state and trait anxiety) than the general population is inconsistent (Verhaak *et al.*, 2007a; Lintsen *et al.*, 2009; Lykeridou *et al.*, 2009; Kumbak *et al.*, 2010; Turner *et al.*, 2013). [B];
- before first-line or ART treatment, women do not show more psychiatric disorders or general psychopathology than the general population (Edelman and Connolly, 2000; Salvatore *et al.*, 2001; Dhaliwal *et al.*, 2004; Van den Broeck *et al.*, 2010; Zaig *et al.*, 2013). [C].

*How can fertility staff detect the needs of patients before treatment?*

The GDG recommends that fertility staff:

- offer patients the opportunity to have their needs assessed and be informed about their emotional adjustment before the start of treatment. [GPP];
- use the tools listed in [Supplementary Data](#) when assessing patients' needs. [GPP].

#### Behavioural needs

Fertility staff should:

- be aware that currently there are no reliable pre-treatment tools or predictors to identify patients who are not likely to start recommended fertility treatment (Gameiro *et al.*, 2012). [B];

not assume that patients fully self-report on risk factors for reduced fertility (e.g. eating disorders) (Freizinger *et al.*, 2010). [C];

be aware that risk factors (e.g. smoking, alcohol use and diet) for reduced fertility can be assessed with self-administered online tools (Landkroon *et al.*, 2010). [C];

The GDG recommends that fertility staff consider explicitly screening risk factors (e.g. drug use and eating disorders) for reduced fertility (Freizinger *et al.*, 2010). [GPP];

#### Relational and social needs

Fertility staff should be aware that:

- women experience higher social and sexual infertility-specific stress than men (Slade *et al.*, 1997; Newton *et al.*, 1999; Peterson *et al.*, 2007; Peterson *et al.*, 2008; Donarelli *et al.*, 2012; Peterson *et al.*, 2014). [C];

the ways patients deal with their fertility problems are associated with infertility-specific relational and social distress:

The use of meaning-based coping (e.g. thinking about the fertility problem in a positive light, finding other goals in life) seems to be associated with lower fertility-specific marital and social distress.

The use of avoidance coping strategies (e.g. avoiding being among pregnant women) seems to be associated with higher fertility-specific marital and social distress (Peterson *et al.*, 2008). [C]

in couples, the way one partner reacts to the infertility condition/diagnosis is associated with how the other partner reacts (Peterson *et al.*, 2008; Peterson *et al.*, 2014). [C] couples who have different views on the importance of parenthood and social concerns may show lower relationship satisfaction than those who have similar views (Peterson *et al.*, 2003). [C]

#### Emotional needs

Fertility staff should be aware that:

- women have higher levels of depression and infertility stress than men (Slade *et al.*, 1997; Newton *et al.*, 1999; Edelman and Connolly, 2000; Peterson *et al.*, 2003; Reis *et al.*, 2013; Peterson *et al.*, 2014). [C]; patients with a lower occupational status experience higher infertility stress and anxiety than patients with a medium or high occupational status (Lykeridou *et al.*, 2009; Lykeridou *et al.*, 2011). [C];

women whose partner has male factor infertility experience higher anxiety than women with female factor, mixed or unexplained infertility, whereas the type of infertility diagnosis is not related to depression (Lykeridou *et al.*, 2009). [C];

the way patients deal with their fertility problems is associated with their infertility distress: The use of passive coping (e.g. rumination and withdrawal) seems to be associated with higher levels of infertility distress.

The use of active coping (e.g. goal-oriented problem-solving, thinking rationally about the problem) seems to be associated with lower infertility distress (Van den Broeck *et al.*, 2010). [C];

individuals who perceive their partner to be available and responsive experience lower infertility stress than individuals who perceive their partner to be avoidant and non-responsive (Van den Broeck *et al.*, 2010; Donarelli *et al.*, 2012). [C];

in couples, each partner's depressive symptoms are associated with their own and their partner's infertility-specific distress (Peterson *et al.*, 2014). [C];

the SCREENIVF is an infertility-specific validated tool designed to be used before the start of treatment, to assess risk factors for emotional problems after a treatment cycle (Verhaak *et al.*, 2010; Van Dongen *et al.*, 2012). [B].

The GDG recommends that fertility staff use the SCREENIVF before the start of each treatment cycle to assess patients' risk factors for emotional problems after the cycle. [GPP].

*How can fertility staff address the needs of patients before treatment?*

The GDG recommends that fertility staff refer patients at risk of experiencing



clinically significant psychosocial problems to specialized psychosocial care (infertility counselling or psychotherapy). [GPP].

#### Behavioural needs

Fertility staff should:

provide preparatory information about medical procedures because it promotes compliance (Pook and Krause, 2005; Lykeridou et al., 2009, 2011). [B]; be aware that weight-loss programmes based on diet and exercise offered pre-ART treatment may be effective in reducing weight and BMI (Clark et al., 1998; Moran et al., 2011). [B].

The GDG recommends that fertility staff:

consider providing patients with information about lifestyle behaviours that may negatively affect their general and reproductive health. [GPP]; support patients in changing lifestyle behaviours that negatively affect their general and reproductive health, as well as their chances of treatment success. [GPP].

#### Relational and social needs

The GDG recommends that fertility staff:

offer additional psychosocial care to patients at risk of experiencing increased infertility-specific relational and social distress. [GPP]; actively involve both partners of the couple in the diagnosis and treatment process. [GPP].

#### Emotional needs

Fertility staff should provide preparatory information about medical procedures because it decreases infertility-specific anxiety and stress (Pook and Krause, 2005). [C]

The GDG recommends that fertility staff:

refer patients identified by the SCREENIVF as being at risk of emotional problems to specialized psychosocial care (infertility counselling or psychotherapy). [GPP]; actively involve both partners of the couple in the diagnosis and treatment process. [GPP].

#### Cognitive needs

Fertility staff should provide preparatory information about medical procedures because it increases patient knowledge (Hope and Rombauts, 2010). [C].

### Psychosocial care during treatment

The 'during treatment' period refers to time that encompasses any treatment cycle, being it either first-line treatment such as IUI or ART cycles.

#### What are the needs of patients during treatment?

##### Behavioural needs

Fertility staff should be aware that:

around 1 in 12 patients and 1 in 5 patients do not comply with first-line and ART treatment, respectively (Brandes et al., 2009; Gameiro et al., 2013b). [A]; the reasons patients state for discontinuing recommended first-line treatment are: postponement of treatment (i.e. stopping treatment for at least 1 year), logistics and practical reasons, rejection of treatment, perception of poor prognosis and the psychological burden of treatment (Gameiro et al., 2012). [A];

the reasons patients state for discontinuing recommended treatment after one failed IVF/ICSI cycle are: financial issues, the psychological and physical burdens of treatment, clinic-related reasons and organizational problems, postponement of treatment (or unknown) and relational problems (Gameiro et al., 2012). [A];

the reasons patients state for discontinuing a recommended standard ART treatment programme of three consecutive cycles are: postponement of treatment, the psychological burden of treatment, the physical and psychological burdens of treatment and personal problems (Gameiro et al., 2012). [A].

#### Relational and social needs

Fertility staff should be aware that:

relational satisfaction of patients does not change from before they start an IVF/ICSI cycle to after the pregnancy test (Verhaak et al., 2001). [B]; women report more intimacy with their partner during an IVF/ICSI cycle than during a normal menstrual cycle, in particular at the retrieval and transfer days of the cycle (Boivin and Takefman, 1996). [B]; women experience lower sexual satisfaction after the pregnancy test than before the start of an IVF/ICSI cycle (Verhaak et al., 2001). [B]; women report lower social support from significant others in the period between the oocyte retrieval and the embryo transfer of an IVF/ICSI cycle than during the equivalent period in a normal menstrual cycle (Boivin and Takefman, 1996). [B]; during an IVF/ICSI cycle, 6 in 10 patients report treatment-related absences from work and, on average, patients miss 23 h of work (Bouwman et al., 2008). [C].

#### Emotional needs

Fertility staff should be aware that:

patients' emotional stress fluctuates during an IVF/ICSI cycle, with peaks at the oocyte retrieval, the embryo transfer and the waiting period before the pregnancy test (Boivin and Takefman, 1996; Boivin et al., 1998; Knoll et al., 2009; Turner et al., 2013). [B]; women's positive affect decreases during an IVF/ICSI cycle (Knoll et al., 2009; Boivin and Lancaster, 2010). [B]; anxiety and stress are higher when patients are anticipating results (e.g. in the waiting period before the pregnancy test, between oocyte retrieval and embryo transfer) (Boivin and Takefman, 1996; Boivin et al., 1998; Verhaak et al., 2007a; Knoll et al., 2009). [B]; patients experience high emotional distress when they are informed that the treatment was unsuccessful (Verhaak et al., 2007a). [B]; when they are informed that the treatment was unsuccessful, 1 to 2 in 10 women experience clinically significant levels of depressive symptoms (Verhaak et al., 2007a). [B]; after receiving the pregnancy test for their IVF/ICSI treatment, 1 in 4 women and 1 in 10 men have a depressive disorder. One in 7 women and 1 in 20 men have an anxiety disorder (Volgsten et al., 2008; Volgsten et al., 2010). [B].

#### Cognitive needs

Fertility staff should be aware that patients report moderate-to-high concerns about achieving pregnancy with a healthy live birth, which do not decrease across treatment (Klonoff-Cohen et al., 2007). [C].

#### How can fertility staff detect the needs of patients during treatment?

The GDG recommends the fertility staff use the tools listed in [Supplementary Data](#) when assessing patients' needs. [GPP].

#### Behavioural needs

Fertility staff should be aware that currently there are no reliable tools or predictors to identify patients not likely to comply with recommended treatment (Gameiro et al., 2012). [B].

#### Relational and social needs

Fertility staff should be aware that:

at the start of ovarian stimulation, at oocyte retrieval and after the pregnancy test, men report lower perceived support than women (Agostini et al., 2011). [C]; men report higher social isolation than women during an IVF/ICSI treatment cycle (Boivin et al., 1998). [C]; patients with lower education level or physical or emotional complaints due to IVF/ICSI may take more treatment-related hours off work (Bouwman et al., 2008). [C].

### Emotional needs

Fertility staff should be aware that:

women are more likely to experience anxiety, depression, stress and/or psychiatric morbidity than men (Boivin *et al.*, 1998; Berghuis and Stanton, 2002; Montagnini *et al.*, 2009; Chiaffarino *et al.*, 2011; Verhaak *et al.*, 2005b). [B]; the number of previous treatment cycles is not associated with depression, anxiety or incidence of psychiatric disorders for men and women undergoing treatment (Khademi *et al.*, 2005; Volgsten *et al.*, 2010; Chiaffarino *et al.*, 2011; Newton *et al.*, 2013; Turner *et al.*, 2013). [C]; patients undergoing mild stimulation IVF/ICSI (as opposed to standard stimulation) are more likely to experience negative emotional reactions at oocyte retrieval but less likely to experience these reactions during hormonal stimulation and after a treatment cycle cancellation or failure (de Klerk *et al.*, 2006). [C]; patients with a previous history of vulnerability to mental health disorders are more likely to experience depression, anxiety and/or psychiatric morbidity during treatment (Zaig *et al.*, 2013). [C]; the ways women deal with their fertility problems are associated with infertility-specific distress; The use of avoidant coping (e.g. avoiding being among pregnant women) is associated with higher infertility-specific distress. The use of emotional expressive coping (e.g. expressing feelings to significant others) is associated with lower infertility-specific distress (Panagopoulou *et al.*, 2006). [C]; patients with low acceptance of infertility and childlessness are more likely to experience anxiety and depression when they are informed that the treatment was unsuccessful (Verhaak *et al.*, 2005b). [C]; patients who experience high helplessness regarding infertility and its treatment are more likely to experience anxiety and depression when they are informed that the treatment was unsuccessful (Verhaak *et al.*, 2005b). [C]; in couples, the way one partner reacts to infertility and its treatment is associated with how the other partner reacts (Berghuis and Stanton, 2002; Knoll *et al.*, 2009). [C].

### Cognitive needs

Fertility staff should be aware that currently there are no reliable methods or information about predictors of the concerns patients have about treatment (Klonoff-Cohen *et al.*, 2007). [C].

### How can fertility staff address the needs of patients during treatment?

The GDG recommends that fertility staff refer patients at risk of experiencing clinically significant psychosocial problems to specialized psychosocial care (infertility counselling or psychotherapy). [GPP].

### Behavioural needs

The GDG recommends that fertility staff offer patients the opportunity to discuss uptake or not of recommended treatment and receive decisional support to deliberate their choice. [GPP].

### Relational and social needs

Fertility staff should be aware that:

offering the currently available interactive complex interventions (complex interventions integrate several psychosocial components (e.g. information provision, training in coping or relaxation strategies) is not likely to improve patient interpersonal relationships or sexual concerns (Shu-Hsin, 2003). [B]; providing IVF/ICSI-patients with access to an internet-based personal health record is not likely to improve their social support (Tuil *et al.*, 2007). [B];

The GDG recommends that fertility staff:

offer additional psychosocial care to patients with specific characteristics associated with social isolation or absence from work. [GPP]; actively involve both partners of the couple in the treatment process. [GPP].

### Emotional needs

Fertility staff should be aware that:

offering the currently available complex interventions is not likely to improve patients' depression levels (Shu-Hsin, 2003; van Zyl *et al.*, 2005; Gürhan *et al.*, 2007). [B]; providing IVF/ICSI-patients with access to an internet-based personal health record is not likely to improve their emotional well-being (anxiety, depression and self-efficacy) (Tuil *et al.*, 2007). [B].

The GDG recommends that fertility staff:

offer additional psychosocial care to patients with specific characteristics associated with negative emotional reactions. [GPP]; actively involve both partners of the couple in the treatment process. [GPP].

### Cognitive needs

Fertility staff should be aware that providing IVF/ICSI patients with access to an internet-based personal health record is not likely to increase their knowledge about infertility and its treatment (Tuil *et al.*, 2007). [B].

The GDG recommends that fertility staff offer patients the opportunity to discuss and clarify their treatment-related concerns. [GPP].

### Psychosocial care after treatment

The 'after treatment' period refers to the period starting 1 year after patients undergo their last treatment cycle, and the section differentiates between people who did not conceive with treatment (i.e. unsuccessful treatment) and people who did (i.e. successful treatment that results in live birth).

### What are the needs of patients after treatment?

#### After unsuccessful treatment

##### Relational and social needs

Fertility staff should be aware that ~2 years after unsuccessful IVF/ICSI treatment patients are generally satisfied with their marital relationship (Sydsjo *et al.*, 2005; Johansson *et al.*, 2009). [C].

The evidence about the behavioural and emotional needs of patients after unsuccessful IVF treatment is too limited for supporting recommendations. No evidence was found on patients' cognitive needs.

#### Pregnancy after treatment

##### Behavioural needs

Fertility staff should be aware that women who achieve pregnancy with fertility treatment practice lifestyle behaviours that are similar to women who conceive spontaneously (Fisher *et al.*, 2013). [C].

##### Relational and social needs

Fertility staff should be aware that the way patients relate to their foetus is similar whether the foetus is conceived with ART treatment or spontaneously (Hammarberg *et al.*, 2008; Hjelmstedt and Collins, 2008; Karatas *et al.*, 2011). [C].

##### Emotional needs

Fertility staff should be aware that:

women who conceived with IVF/ICSI do not experience more symptoms of depression, worse self-esteem or worse mental health during pregnancy than women who conceive spontaneously (Hammarberg *et al.*, 2008; Vilksa *et al.*, 2009; McMahon *et al.*, 2011). [A]; women who conceived with IVF/ICSI may experience more pregnancy-specific anxiety than women who conceived spontaneously (Hammarberg *et al.*, 2008). [B].

##### Cognitive needs

Fertility staff should be aware that women with multiple pregnancies after IVF/ICSI may have higher maternal expectations than women with spontaneous multiple pregnancies (Baor and Soskolne, 2010). [C].

### How can fertility staff detect the needs of patients after treatment?

#### After unsuccessful treatment

The GDG recommends that fertility staff use the tools listed in [Supplementary Data](#) when assessing patients' needs. [GPP].

#### *Behavioural needs*

Fertility staff should be aware that former patients who remain childless 5 years after unsuccessful IVF/ICSI treatment may use more sleeping pills, smoke more often and consume more alcohol than former patients that become parents via adoption, or spontaneously (Johansson et al., 2009). [C].

#### *Relational and social needs*

Fertility staff should be aware that former patients that remain childless 5 years after unsuccessful IVF/ICSI treatment are three times more likely to separate than former patients that become parents via adoption, or spontaneously (Johansson et al., 2009). [C].

#### *Emotional needs*

Fertility staff should be aware that:

women who remain childless 10 years after unsuccessful IVF/ICSI treatment are not more likely to develop psychiatric disorders than women of the same age who never underwent fertility treatment (Yli-Kuha et al., 2010). [C];

women with a persistent desire for pregnancy 3 to 5 years after unsuccessful treatment may experience more anxiety and depression than women who find new life goals or women who become mothers (Verhaak et al., 2007b). [C].

No evidence was available on detection of cognitive needs of patients after unsuccessful fertility treatment.

#### *Pregnancy after treatment*

##### *Emotional needs*

Fertility staff should be aware that:

women who experienced multiple failed ART cycles or high stress during treatment may be more likely to experience symptoms of anxiety during pregnancy (Hammarberg et al., 2008). [C];

patients with multiple pregnancies after ART are not more likely to experience poorer mental health than patients with a single ART pregnancy (Vilksa et al., 2009). [C].

To our knowledge, there are no studies assessing predictors of the behavioural, relational or cognitive needs of patients after treatment.

#### *How can fertility staff address the needs of patients after treatment?*

##### *After unsuccessful treatment*

The GDG recommends that fertility staff:

refer patients who, when ending unsuccessful treatment, experience or are at risk of experiencing (in the short or long term) clinically significant psychosocial problems to specialized psychosocial care (infertility counselling or psychotherapy). [GPP];

offer additional psychosocial care to patients who, when ending unsuccessful treatment, are at risk of increased infertility-specific psychosocial distress. [GPP];

offer patients the opportunity to discuss the implications of ending unsuccessful treatment. [GPP].

##### *Pregnancy after treatment*

The GDG recommends that fertility staff:

refer patients who experience or are at risk of experiencing clinically significant psychosocial problems after successful treatment to specialized psychosocial care (infertility counselling or psychotherapy). [GPP];

offer additional psychosocial care to patients at risk of increased infertility-specific psychosocial distress after successful treatment. [GPP];

offer patients the opportunity to discuss their worries about pregnancy achieved with fertility treatment. [GPP].

## Conclusion

This is the first guideline offering evidence-based and good practice recommendations to all fertility staff about how to implement routine psychosocial care at fertility clinics. All recommendations resulted from consensus within the GDG and were submitted to an extensive transparent review by relevant stakeholders.

During the development of this guideline, it became clear that the evidence available to fully answer many key questions was either non-existent, scarce or of low quality. Indeed, many issues could not be resolved based on the available literature. Of the 125 recommendations, 45 (36.0%) are based on high-quality evidence (grade A or B), 51 (40.8%) on moderate (grade C) and 29 (23.2%) formulated as a GPP based on expert opinion. Future projects should endeavour to perform high-quality research to address the gaps in knowledge identifies.

Beyond the recommendations listed in the previous sections, four main conclusions can be taken from the evidence reviewed in this guideline. First, patients have clear preferences about the care they receive. Fertility staff should know these preferences and incorporate them in service delivery. Second, fertility staff must inform themselves of the specific needs patients experience at different treatment stages and tailor psychosocial care accordingly. Third, some patients are more vulnerable to the demands of treatment and need additional psychosocial care or specialized mental-health services (i.e. infertility counselling or psychotherapy). Fertility staff must be informed about risk factors for increased psychosocial needs and should consider using the SCREENIVF before the start of fertility treatment to identify patients at risk of developing emotional problems. Finally, the most effective way to start implementing psychosocial care is by providing preparatory information because it is expected to be simpler and feasible to implement compared with other reviewed interventions and shown to be efficacious in addressing many patient needs.

## Supplementary data

Supplementary data are available at <http://humrep.oxfordjournals.org/>.

## Acknowledgements

The GDG acknowledges the help of many clinicians and patient organizations who refereed the content of the Guideline. Not less than 237 comments were received of which 87 indeed in some way changed the Guideline. The authors also thank Willianne Nelen for advice on guideline development.

## Authors' roles

S.G. chaired the GDG and hence fulfilled a leading role in collecting the evidence, writing the manuscript and dealing with reviewer comments. N.V., as methodological expert, performed all literature searches for the guideline, provided methodological support and was overall coordinator of the guideline production. All other authors, listed in alphabetical order, as guideline group members, contributed equally to the manuscript, by drafting key questions, synthesizing evidence, writing the different parts of the guideline and discussing recommendations until consensus within the group was reached.

## Funding

The study has no external funding; all costs are covered by ESHRE.

## Conflict of interest

S.G., E.D., C.d.K., M.E., U.V.d.B., C.L.-J. and N.V. report no conflicts of interest. J.B. reports grants from Merck & Co, consulting fees from Merck Serono S.A. and Speaker's fees from Merck Serono S.A. P.T. reports consulting fees from the German government and being the Chair of the German Society for Fertility Counselling. C.V. reports consulting fees from Merck Serono S.A. C.M.V. reports being adviser in projects for Merck Serono S.A. and Ferring S.A. on patient educational material. T.W. reports speaker's fees from Repromed, DGPM, Breitbach, DAAG, fiore, LPTW, MSD, salary/position funding at TAB-beim-Bundestag, BZgA, and being the Vice-chair of the German Society for Fertility Counselling.

## References

- Aarts JW, Huppelschoten AG, van Empel IW, Boivin J, Verhaak CM, Kremer JA *et al.* How patient-centred care relates to patients' quality of life and distress: a study in 427 women experiencing infertility. *Hum Reprod* 2012;**27**:488–495.
- Agostini F, Monti F, De Pascalis L, Paterlini M, La Sala GB, Blickstein I. Psychosocial support for infertile couples during assisted reproductive technology treatment. *Fertil Steril* 2011;**95**:707–710.
- Baor L, Soskolne V. Mothers of IVF and spontaneously conceived twins: a comparison of prenatal maternal expectations, coping resources and maternal stress. *Hum Reprod* 2010;**25**:1490–1496.
- Beck AT, Beamesderfer A. Assessment of depression: The depression inventory. *Pharmacopsychiatry* 1976;**7**:151–169.
- Berghuis JP, Stanton AL. Adjustment to a dyadic stressor: a longitudinal study of coping and depressive symptoms in infertile couples over an insemination attempt. *J Consult Clin Psychol* 2002;**70**:433–438.
- Boivin J, Takefman JE. Impact of the in-vitro fertilization process on emotional, physical and relational variables. *Hum Reprod* 1996;**11**:903–907.
- Boivin J, Lancastle D. Medical waiting periods: imminence, emotions and coping. *Womens Health* 2010;**6**:59–69.
- Boivin J, Andersson L, Skoog-Svanberg A, Hjelmstedt A, Collins A, Bergh T. Psychological reactions during in-vitro fertilization: similar response pattern in husbands and wives. *Hum Reprod* 1998;**13**:3262–3267.
- Boivin J, Takefman J, Braverman A. The fertility quality of life (FertiQoL) tool: development and general psychometric properties. *Hum Reprod* 2011;**26**:2084–2091.
- Bouwman CA, Lintsen BA, Al M, Verhaak CM, Eijkemans RJ, Habbema JD *et al.* Absence from work and emotional stress in women undergoing IVF or ICSI: an analysis of IVF-related absence from work in women and the contribution of general and emotional factors. *Acta Obstet Gynecol Scand* 2008;**87**:1169–1175.
- Brandes M, van der Steen JO, Bokdam SB, Hamilton CJ, de Bruin JP, Nelen WL *et al.* When and why do subfertile couples discontinue their fertility care? A longitudinal cohort study in a secondary care subfertility population. *Hum Reprod* 2009;**24**:3127–3135.
- Bunting L, Boivin J. Development and preliminary validation of the fertility status awareness tool: FertiSTAT. *Hum Reprod* 2010;**25**:1722–1733.
- Bunting L, Tsibulsky I, Boivin J. Fertility knowledge and beliefs about fertility treatment: findings from the International Fertility Decision-making Study. *Hum Reprod* 2013;**28**:385–397.
- Cancer Care for the Whole Patient: Meeting Psychosocial Health Needs. Washington, DC, USA: National Academies Press; 2008.
- Chiaffarino F, Baldini MP, Scarduelli C, Bommarito F, Ambrosio S, D'Orsi C *et al.* Prevalence and incidence of depressive and anxious symptoms in couples undergoing assisted reproductive treatment in an Italian infertility department. *Eur J Obstet Gynecol Reprod Biol* 2011;**158**:235–241.
- Clark AM, Thornley B, Tomlinson L, Galletley C, Norman RJ. Weight loss in obese infertile women results in improvement in reproductive outcome for all forms of fertility treatment. *Hum Reprod* 1998;**13**:1502–1505.
- Cousineau TM, Green TC, Corsini EA, Seibring AR, Showstack MT, Applegarth L *et al.* Online psychoeducational support for infertile women: a randomized controlled trial. *Hum Reprod* 2008;**23**:554–566.
- Dancet EA, Nelen WL, Sermeus W, De Leeuw L, Kremer JA, D'Hooghe TM. The patients' perspective on fertility care: a systematic review. *Hum Reprod Update* 2010;**16**:467–487.
- de Klerk C, Heijnen EM, Macklon NS, Duivenvoorden HJ, Fauser BC, Passchier J *et al.* The psychological impact of mild ovarian stimulation combined with single embryo transfer compared with conventional IVF. *Hum Reprod* 2006;**21**:721–727.
- Development of the World Health Organization WHOQOL-BREF quality of life assessment. The WHOQOL Group. *Psychol Med* 1998;**28**:551–558.
- Dhaliwal LK, Gupta KR, Gopalan S, Kulhara P. Psychological aspects of infertility due to various causes-prospective study. *Int J Fertil Womens Med* 2004;**49**:44–48.
- Donarelli Z, Lo Coco G, Gullo S, Marino A, Volpes A, Allegra A. Are attachment dimensions associated with infertility-related stress in couples undergoing their first IVF treatment? A study on the individual and cross-partner effect. *Hum Reprod* 2012;**27**:3215–3225.
- Edelmann RJ, Connolly KJ. Gender differences in response to infertility and infertility investigations: real or illusory. *Br J Health Psychol* 2000;**5**:365–375.
- Fisher J, Wynter K, Hammarberg K, McBain J, Gibson F, Boivin J *et al.* Age, mode of conception, health service use and pregnancy health: a prospective cohort study of Australian women. *BMC Pregnancy Childbirth* 2013;**13**:88.
- Florian V, Drory Y. Mental Health Inventory (MHI)-Psychometric properties and normative data in the Israeli population. *Psychologia* 1990;**2**:26–35.
- Freizinger M, Franko DL, Dacey M, Okun B, Domar AD. The prevalence of eating disorders in infertile women. *Fertil Steril* 2010;**93**:72–78.
- Gameiro S, Boivin J, Peronace L, Verhaak CM. Why do patients discontinue fertility treatment? A systematic review of reasons and predictors of discontinuation in fertility treatment. *Hum Reprod Update* 2012;**18**:652–669.
- Gameiro S, Canavarro MC, Boivin J. Patient centred care in infertility health care: direct and indirect associations with wellbeing during treatment. *Patient Educ Couns* 2013a;**93**:646–654.
- Gameiro S, Verhaak CM, Kremer JA, Boivin J. Why we should talk about compliance with assisted reproductive technologies (ART): a systematic review and meta-analysis of ART compliance rates. *Hum Reprod Update* 2013b;**19**:124–135.
- Gameiro S, van den Belt-Dusebout AW, Bleiker E, Braat D, van Leeuwen FE, Verhaak CM. Do children make you happier? Sustained child-wish and mental health in women 11–17 years after fertility treatment. *Hum Reprod* 2014;**29**:2238–2246.
- Goldberg DP. Manual of the General Health Questionnaire. Windsor, UK: National Foundation for Educational Research; 1978.
- Gürhan N, Oflaz F, Atici D, Akyuz A, Vural G. Effectiveness of nursing counseling on coping and depression in women undergoing in vitro fertilization. *Psychol Rep* 2007;**100**:365–374.
- Hammarberg K, Fisher JR, Wynter KH. Psychological and social aspects of pregnancy, childbirth and early parenting after assisted conception: a systematic review. *Hum Reprod Update* 2008;**14**:395–414.
- Hjelmstedt A, Collins A. Psychological functioning and predictors of father-infant relationship in IVF fathers and controls. *Scand J Caring Sci* 2008;**22**:72–78.
- Holter H, Sandin-Bojo AK, Gejervall AL, Wikland M, Wilde-Larsson B, Bergh C. Quality of care in an IVF programme from a patient's perspective: development of a validated instrument. *Hum Reprod* 2014;**29**:534–547.



- Hope N, Rombauts L. Can an educational DVD improve the acceptability of elective single embryo transfer? A randomized controlled study. *Fertil Steril* 2010;**94**:489–495.
- Johansson M, Adolfsson A, Berg M, Francis J, Hogstrom L, Janson PO et al. Quality of life for couples 4–5.5 years after unsuccessful IVF treatment. *Acta Obstet Gynecol Scand* 2009;**88**:291–300.
- Johansson M, Adolfsson A, Berg M, Francis J, Hogstrom L, Janson PO et al. Gender perspective on quality of life, comparisons between groups 4–5.5 years after unsuccessful or successful IVF treatment. *Acta Obstet Gynecol Scand* 2010;**89**:683–691.
- Karatas JC, Strong KA, Barlow-Stewart K, McMahon C, Meiser B, Roberts C. Psychological impact of preimplantation genetic diagnosis: a review of the literature. *Reprod Biomed Online* 2010;**20**:83–91.
- Karatas JC, Barlow-Stewart K, Meiser B, McMahon C, Strong KA, Hill W et al. A prospective study assessing anxiety, depression and maternal-fetal attachment in women using PGD. *Hum Reprod* 2011;**26**:148–156.
- Khademi A, Alleyassin A, Aghahosseini M, Ramezanzadeh F, Abhari AA. Pretreatment Beck Depression Inventory score is an important predictor for post-treatment score in infertile patients: a before-after study. *BMC Psychiatry* 2005;**5**:25.
- Klonoff-Cohen H, Natarajan L, Marrs R, Yee B. Effects of female and male smoking on success rates of IVF and gamete intra-Fallopian transfer. *Hum Reprod* 2001;**16**:1382–1390.
- Klonoff-Cohen H, Natarajan L, Klonoff E. Validation of a new scale for measuring Concerns of Women Undergoing Assisted Reproductive Technologies (CART). *J Health Psychol* 2007;**12**:352–356.
- Knoll N, Schwarzer R, Pfüller B, Kienle R. Transmission of depressive symptoms: a study with couples undergoing assisted-reproduction treatment. *Eur Psychologist* 2009;**14**:7–17.
- Kumbak B, Atak IE, Attar R, Yildirim G, Yesildaglar N, Ficioglu C. Psychologic influence of male factor infertility on men who are undergoing assisted reproductive treatment: a preliminary study in a Turkish population. *J Reprod Med* 2010;**55**:417–422.
- Landkroon AP, de Weerd S, van Vliet-Lachotzki E, Steegers EA. Validation of an internet questionnaire for risk assessment in preconception care. *Public Health Genomics* 2010;**13**:89–94.
- Lewis AM, Liu D, Stuart SP, Ryan G. Less depressed or less forthcoming? Self-report of depression symptoms in women preparing for in vitro fertilization. *Arch Womens Ment Health* 2013;**16**:87–92.
- Lintsen AM, Verhaak CM, Eijkemans MJ, Smeenk JM, Braat DD. Anxiety and depression have no influence on the cancellation and pregnancy rates of a first IVF or ICSI treatment. *Hum Reprod* 2009;**24**:1092–1098.
- Lykeridou K, Gourounti K, Deltsidou A, Loutradis D, Vaslamatzis G. The impact of infertility diagnosis on psychological status of women undergoing fertility treatment. *J Reprod Infant Psychol* 2009;**27**:223–237.
- Lykeridou K, Gourounti K, Sarantaki A, Loutradis D, Vaslamatzis G, Deltsidou A. Occupational social class, coping responses and infertility-related stress of women undergoing infertility treatment. *J Clin Nurs* 2011;**20**:1971–1980.
- McMahon CA, Boivin J, Gibson FL, Hammarberg K, Wynter K, Saunders D et al. Age at first birth, mode of conception and psychological wellbeing in pregnancy: findings from the parental age and transition to parenthood Australia (PATPA) study. *Hum Reprod* 2011;**26**:1389–1398.
- Montagnini HML, Blay SL, Novo NF, de Freitas V, Cedenho AP. Emotional states of couples undergoing in vitro fertilization. *Estudos de Psicologia* 2009;**26**:475–481.
- Moran L, Tsagareli V, Norman R, Noakes M. Diet and IVF pilot study: short-term weight loss improves pregnancy rates in overweight/obese women undertaking IVF. *Aust N Z J Obstet Gynaecol* 2011;**51**:455–459.
- Mori A. Supporting stress management for women undergoing the early stages of fertility treatment: a cluster-randomized controlled trial. *Jpn J Nurs Sci* 2009;**6**:37–49.
- Mourad SM, Hermens RP, Liefers J, Akkermans RP, Zielhuis GA, Adang E et al. A multi-faceted strategy to improve the use of national fertility guidelines; a cluster-randomized controlled trial. *Hum Reprod* 2011;**26**:817–826.
- Nelen WL. ESHRE manual for guideline development. 2009. [www.eshre.eu/guidelines](http://www.eshre.eu/guidelines) (1 December 2014, date last accessed).
- Newton CR, Sherrard W, Glavac I. The Fertility Problem Inventory: measuring perceived infertility-related stress. *Fertil Steril* 1999;**72**:54–62.
- Newton C, Feyles V, Asgary-Eden V. Effect of mood states and infertility stress on patients' attitudes toward embryo transfer and multiple pregnancy. *Fertil Steril* 2013;**100**:530–537.
- Panagopoulou E, Vedhara K, Gaintarzi C, Tarlatzis B. Emotionally expressive coping reduces pregnancy rates in patients undergoing in vitro fertilization. *Fertil Steril* 2006;**86**:672–677.
- Peterson BD, Newton CR, Rosen KH. Examining congruence between partners' perceived infertility-related stress and its relationship to marital adjustment and depression in infertile couples. *Fam Process* 2003;**42**:59–70.
- Peterson BD, Newton CR, Feingold T. Anxiety and sexual stress in men and women undergoing infertility treatment. *Fertil Steril* 2007;**88**:911–914.
- Peterson BD, Pirritano M, Christensen U, Schmidt L. The impact of partner coping in couples experiencing infertility. *Hum Reprod* 2008;**23**:1128–1137.
- Peterson BD, Sejbæk CS, Pirritano M, Schmidt L. Are severe depressive symptoms associated with infertility-related distress in individuals and their partners? *Hum Reprod* 2014;**29**:76–82.
- Pinborg A, Hougaard CO, Nyboe Andersen A, Molbo D, Schmidt L. Prospective longitudinal cohort study on cumulative 5-year delivery and adoption rates among 1338 couples initiating infertility treatment. *Hum Reprod* 2009;**24**:991–999.
- Pook M, Krause W. Stress reduction in male infertility patients: a randomized, controlled trial. *Fertil Steril* 2005;**83**:68–73.
- Reis S, Xavier MR, Coelho R, Montenegro N. Psychological impact of single and multiple courses of assisted reproductive treatments in couples: a comparative study. *Eur J Obstet Gynecol Reprod Biol* 2013;**171**:61–66.
- Ryan M. Using conjoint analysis to take account of patient preferences and go beyond health outcomes: an application to in vitro fertilisation. *Soc Sci Med* 1999;**48**:535–546.
- Salvatore P, Gariboldi S, Offidani A, Coppola F, Amore M, Maggini C. Psychopathology, personality, and marital relationship in patients undergoing in vitro fertilization procedures. *Fertil Steril* 2001;**75**:1119–1125.
- Schilling K, Toth B, Rosner S, Strowitzki T, Wischmann T. Prevalence of behaviour-related fertility disorders in a clinical sample: results of a pilot study. *Arch Gynecol Obstet* 2012;**286**:1307–1314.
- Schmidt L, Holstein BE, Boivin J, Sangren H, Tjornhoj-Thomsen T, Blaabjerg J et al. Patients' attitudes to medical and psychosocial aspects of care in fertility clinics: findings from the Copenhagen Multi-centre Psychosocial Infertility (COMPI) Research Programme. *Hum Reprod* 2003;**18**:628–637.
- Scottish Intercollegiate Guidelines Network EH, 8–10 Hillside Crescent, Edinburgh EH7 5EA. <http://www.sign.ac.uk>. 2010 (1 December 2014, date last accessed).
- Sexton MB, Byrd MR, O'Donohue WT, Jacobs NN. Web-based treatment for infertility-related psychological distress. *Arch Womens Ment Health* 2010;**13**:347–358.
- Shindel AW, Nelson CJ, Naughton CK, Ohebshalom M, Mulhall JP. Sexual function and quality of life in the male partner of infertile couples: prevalence and correlates of dysfunction. *J Urol* 2008;**179**:1056–1059.
- Shu-Hsin L. Effects of using a nursing crisis intervention program on psychosocial responses and coping strategies of infertile women during in vitro fertilization. *J Nurs Res* 2003;**11**:197–208.
- Slade P, Emery J, Lieberman BA. A prospective, longitudinal study of emotions and relationships in in-vitro fertilization treatment. *Hum Reprod* 1997;**12**:183–190.
- Stewart L, Hamilton M, McTavish A, Fitzmaurice A, Graham W. Randomized controlled trial comparing couple satisfaction with appointment and

- telephone follow-up consultation after unsuccessful IVF/ICSI treatment. *Hum Fertil (Camb)* 2001;**4**:249–255.
- Sydsjo G, Ekholm K, Wadsby M, Kjellberg S, Sydsjo A. Relationships in couples after failed IVF treatment: a prospective follow-up study. *Hum Reprod* 2005;**20**:1952–1957.
- Tuill WS, Verhaak CM, Braat DD, de Vries Robbe PF, Kremer JA. Empowering patients undergoing in vitro fertilization by providing Internet access to medical data. *Fertil Steril* 2007;**88**:361–368.
- Turner K, Reynolds-May MF, Zitek EM, Tisdale RL, Carlisle AB, Westphal LM. Stress and anxiety scores in first and repeat IVF cycles: a pilot study. *PLoS One* 2013;**8**:e63743.
- Van den Broeck U, D'Hooghe T, Enzlin P, Demyttenaere K. Predictors of psychological distress in patients starting IVF treatment: infertility-specific versus general psychological characteristics. *Hum Reprod* 2010;**25**:1471–1480.
- Van Dongen AJ, Kremer JA, Van Sluisveld N, Verhaak CM, Nelen WL. Feasibility of screening patients for emotional risk factors before in vitro fertilization in daily clinical practice: a process evaluation. *Hum Reprod* 2012;**27**:3493–3501.
- van Empel IW, Aarts JW, Cohlen BJ, Huppelschoten DA, Laven JS, Nelen WL *et al*. Measuring patient-centredness, the neglected outcome in fertility care: a random multicentre validation study. *Hum Reprod* 2010;**25**:2516–2526.
- van Empel IW, Dancet EA, Koolman XH, Nelen WL, Stolk EA, Sermeus W *et al*. Physicians underestimate the importance of patient-centredness to patients: a discrete choice experiment in fertility care. *Hum Reprod* 2011;**26**:584–593.
- van Zyl C, van Dyk AC, Niemandt C. The embryologist as counsellor during assisted reproduction procedures. *Reprod Biomed Online* 2005;**11**:545–551.
- Verhaak CM, Smeenk JM, Eugster A, van Minnen A, Kremer JA, Kraaijaat FW. Stress and marital satisfaction among women before and after their first cycle of in vitro fertilization and intracytoplasmic sperm injection. *Fertil Steril* 2001;**76**:525–531.
- Verhaak CM, Smeenk JM, Evers AW, van Minnen A, Kremer JA, Kraaijaat FW. Predicting emotional response to unsuccessful fertility treatment: a prospective study. *J Behav Med* 2005a;**28**:181–190.
- Verhaak CM, Smeenk JM, van Minnen A, Kremer JA, Kraaijaat FW. A longitudinal, prospective study on emotional adjustment before, during and after consecutive fertility treatment cycles. *Hum Reprod* 2005b;**20**:2253–2260.
- Verhaak CM, Smeenk JM, Evers AW, Kremer JA, Kraaijaat FW, Braat DD. Women's emotional adjustment to IVF: a systematic review of 25 years of research. *Hum Reprod Update* 2007a;**13**:27–36.
- Verhaak CM, Smeenk JM, Nahuis MJ, Kremer JA, Braat DD. Long-term psychological adjustment to IVF/ICSI treatment in women. *Hum Reprod* 2007b;**22**:305–308.
- Verhaak CM, Lintsen AM, Evers AW, Braat DD. Who is at risk of emotional problems and how do you know? Screening of women going for IVF treatment. *Hum Reprod* 2010;**25**:1234–1240.
- Vilksa S, Unkila-Kallio L, Punamaki RL, Poikkeus P, Repokari L, Sinkkonen J *et al*. Mental health of mothers and fathers of twins conceived via assisted reproduction treatment: a 1-year prospective study. *Hum Reprod* 2009;**24**:367–377.
- Volgsten H, Skoog Svanberg A, Ekselius L, Lundkvist O, Sundstrom Poromaa I. Prevalence of psychiatric disorders in infertile women and men undergoing in vitro fertilization treatment. *Hum Reprod* 2008;**23**:2056–2063.
- Volgsten H, Skoog Svanberg A, Ekselius L, Lundkvist O, Sundstrom Poromaa I. Risk factors for psychiatric disorders in infertile women and men undergoing in vitro fertilization treatment. *Fertil Steril* 2010;**93**:1088–1096.
- Wischmann T, Korge K, Scherg H, Strowitzki T, Verres R. A 10-year follow-up study of psychosocial factors affecting couples after infertility treatment. *Hum Reprod* 2012;**27**:3226–3232.
- Yli-Kuha AN, Gissler M, Klemetti R, Luoto R, Koivisto E, Hemminki E. Psychiatric disorders leading to hospitalization before and after infertility treatments. *Hum Reprod* 2010;**25**:2018–2023.
- Zaig I, Azem F, Schreiber S, Amit A, Litvin YG, Bloch M. Psychological response and cortisol reactivity to in vitro fertilization treatment in women with a lifetime anxiety or unipolar mood disorder diagnosis. *J Clin Psychiatry* 2013;**74**:386–392.
- Zigmond AS, Snaith RP. The hospital anxiety and depression scale. *Acta Psychiatr Scand* 1983;**67**:361–370.
